1 **Pregnancy and Parenthood in Surgical Training**

2

3 **Authors' names:**

4 Jessica Whitburn (0000-0001-8320-7725), Saiful Miah (0000-0001-5777-518X), Sarah A.  
5 Howles (0000-0001-6342-0895)

6

7 Nuffield Department of Surgical Sciences, University of Oxford, Oxford, OX3 9DU, UK

8 [jessica.whitburn@nhs.net](mailto:jessica.whitburn@nhs.net) Jessica Whitburn

9 Urology Trainee

10

11 Department of Urology, Addenbrookes Hospital, Cambridge University Hospitals, Hill Road,  
12 Cambridge, CB2 0QQ

13 [Saiful.miah@nhs.net](mailto:Saiful.miah@nhs.net) Saiful Miah

14 Consultant Urologist

15

16 Nuffield Department of Surgical Sciences, University of Oxford, Oxford, OX3 9DU, UK

17 [sarah.howles@nds.ox.ac.uk](mailto:sarah.howles@nds.ox.ac.uk) Sarah A. Howles

18 Wellcome Trust Clinical Career Development Fellow, Honorary Consultant Urological  
19 Surgeon

20

21 Correspondence to:

22 Sarah Anne Howles

23 Nuffield Department of Surgical Sciences,

24 University of Oxford,

25 Oxford,

26 OX3 9DU, UK

27 Email: [sarah.howles@nds.ox.ac.uk](mailto:sarah.howles@nds.ox.ac.uk),

28 Telephone: +44 (0)1865857340

29

30 Word count excluding title page, abstract, references, figures, and tables: 3041

31 **Abstract**

32 **Objectives:** To describe pregnancy outcomes, rates of infertility, patterns of parental leave,  
33 and working schedules in surgical trainees in the United Kingdom.

34 **Design:** Cross sectional survey.

35 **Setting:** Surgical training programs in the United Kingdom

36 **Participants:** Four hundred and sixteen individuals who were enrolled on a surgical training  
37 program between June 2022 and March 2023.

38 **Main Outcome Measures:** Self-reported age, gender, infertility investigations, pregnancy  
39 loss, pregnancy-associated complications, live births, parental leave, and working patterns.

40 **Results:** Approximately half of all surgical trainees delayed attempting to have children due  
41 to training, over 80% regretted this decision and 23% of trainees had undergone fertility  
42 testing. Overall, childbearing surgical trainees experienced a pregnancy loss rate of 31%, and  
43 those aged less than 35 years had a pregnancy loss rate of 35%. A third of trainees did not  
44 take any time off work following pregnancy loss and over half of trainees did not disclose  
45 their loss to colleagues. Major pregnancy-associated complications occurred in 31% of  
46 pregnancies in surgical trainees, a significantly higher rate than pregnancies in a socio-  
47 demographically similar control group (9%,  $p=0.0001$ ). Most trainees continued to work at  
48 night throughout their pregnancy and half continued to operate for more than 9 hours each  
49 week up until parental leave; trainees felt guilty for burdening their colleagues by reducing  
50 their workload. Childbearing surgical trainees on average took 10.2 months of parental  
51 leave whilst most non-childbearing surgical trainees took 2 weeks; two thirds of non-  
52 childbearing surgical trainees felt this was insufficient. After parental leave, 61% of  
53 childbearing and 15% of non-childbearing surgical trainees reduced their working hours to  
54 accommodate family life.

55 **Conclusion:** Surgical trainees often delay parenthood due to training and are at risk of high  
56 rates of infertility, pregnancy loss, and major pregnancy-associated complications. This  
57 study highlights the need for changes in surgical culture and training structures to improve  
58 obstetric health and facilitate family life for surgeons in training.

59

60

## 61 Introduction

62 Women were first admitted to medical schools in the late 19<sup>th</sup> century and since then,  
63 female representation in the medical profession has gradually increased<sup>1</sup>. By 2012, in the  
64 United Kingdom (UK) over 60% of doctors on the medical register under the age of 30 were  
65 women and currently the majority of medical students are female<sup>2</sup>. However, female  
66 representation within surgical specialities remains poor; in 2020 only 16% of all consultant  
67 surgeons in the UK were female, with variation by speciality from 7% of trauma and  
68 orthopaedic surgeons to 32% of paediatric surgeons<sup>3</sup>. Similarly, data from the United States  
69 indicate that in 2019 only 22% of all general surgeons were female<sup>4</sup>. Furthermore, surgical  
70 training programs have the greatest gender imbalance in England with women constituting  
71 only 30% of specialist surgical registrars and 27% of the surgical workforce as a whole<sup>5</sup>.

72 Workforce diversity is of benefit to society and is thought to improve multiple outcomes  
73 across organisations<sup>6,7</sup>. Thus, there has been a drive to increase understanding of the causes  
74 of this surgical gender gap and improve access for women to surgical careers. Studies have  
75 reported that surgery can be seen as an unattractive career option for many female  
76 undergraduates due to factors including perceived difficulties in maintaining family life,  
77 limited opportunities for flexible training, and a lack of role models<sup>8-11</sup>. Indeed, the Royal  
78 College of Surgeons of England commissioned Kennedy report of 2021 found that the  
79 experience of parents in surgery is *'extremely challenging and stressful; it demands urgent*  
80 *attention'*. Furthermore, data from the USA and Ireland indicates that female surgeons have  
81 fewer children, are more likely to delay parenthood, are at greater risk of pregnancy-  
82 associated complications, and have higher rates of infertility<sup>12-15</sup>. It is unclear if these  
83 problems persist in other populations, and there is limited data from populations working in  
84 environments that aim to comply with the European Working Time Directive (EWTD), such  
85 as surgical trainees within the UK. It is probable that perceived difficulties in maintaining  
86 work-life balance in surgical careers and the reported risks to fertility and pregnancy  
87 contribute to gender imbalance in surgical training programs via impaired recruitment and  
88 retention.

89

90 We sought to increase understanding of experiences of parenthood in surgical training in  
91 the UK and define the impact of surgical working practices, which typically includes night  
92 shifts, manual handling, and long periods standing to operate, on fertility, and maternal and  
93 neonatal health.

94

## 95 **Methods**

### 96 **Study design and data collection**

97 We performed a descriptive cross-sectional survey in surgical trainees (residents) in the UK.  
98 Our methods are reported in accordance with the Checklist for Reporting Results of Internet  
99 Surveys<sup>16</sup>. A 192-item survey entitled ‘Pregnancy and Parenthood during Surgical training’  
100 was generated (supplementary material). As no existing instrument was validated to  
101 evaluate our study aims, questions were developed based on previous surveys and  
102 literature review<sup>12,15,17,18</sup>. The resultant survey explores all aspects of pregnancy,  
103 childbearing, and parental leave, including information regarding level of training and  
104 working hours. Answers were recorded using a combination of binominal, multiple choice,  
105 and Likert scales. The survey was tested in male and female surgeons and iteratively revised.  
106 The web-based survey tool, JISC (2022, Bristol, UK), was used to administer the  
107 questionnaire, online completion was facilitated via a weblink.

108

109 The survey was distributed via nationally recognised/endorsed surgical specialty trainee  
110 groups and publicised on social media platforms. The survey was open for data collection  
111 from 24<sup>th</sup> June – 24<sup>th</sup> December 2022. All surgical trainees working in the UK were invited to  
112 participate to prevent bias. If a surgeon was a parent but not themselves childbearing, they  
113 were asked to answer questions regarding their partner’s pregnancies. These individuals  
114 served as a socio-demographically similar control group for pregnancy outcomes and are  
115 referred to as non-surgeon partners within the study. Male surgeons with female surgeon  
116 partners in training were excluded from analysis to prevent the same data being captured  
117 twice. Participation was voluntary and uncompensated; the participant information leaflet  
118 explained that survey completion would act as implied consent. Individual trainees were not

119 identifiable from the survey. Ethical approval was gained via the Central University Research  
120 Ethics Committee, University of Oxford (Ref: R80778/RE001).

121

## 122 **Data analysis**

123 Data were analysed in GraphPad Prism (version 9.5.0, California, USA). Significance testing  
124 was performed using  $\chi^2$  or Fishers exact test for non-parametric binary data and Student t  
125 test for continuous variables. All tests of significance were 2-tailed. Missing data was  
126 omitted from analyses. Pregnancy loss rate was calculated using the formula: (total number  
127 of pregnancy losses/total number of pregnancies) x 100.

## 128 **Patient and public involvement**

129 This study was designed and analysed by individuals who are, or have recently been, surgical  
130 trainees.

131

## 132 **Results**

### 133 **Demographics**

134 A total of 440 surgeons completed the survey and 416 surgeons (346 female and 70 male)  
135 were included in the final analysis (Supplemental Figure 1). The majority of participants  
136 were aged 30-39 years (Table 1) and responses spanned all training grades (5% CT1-2, 45%  
137 ST3-5, 35% ST6-8, 16% out of program/other). Most respondents were married or had a  
138 significant partner, childbearing respondents were more likely to be single, and  
139 white/caucasian (Table 1). Non childbearing surgeons were more likely to be in urological or  
140 ENT training, have a partner working <40 hrs per week, and have a partner working as a  
141 physician or surgeon (Table 1).

142

### 143 **Childbearing**

144 A total of 352 live births during surgical training were reported by 212 individuals (171  
145 childbearing and 41 non-childbearing). Childbearing and non-childbearing trainee surgeons  
146 had similar numbers of children (Table 1). Fifty six percent of childbearing and 40% of non-

147 childbearing surgical trainees delayed having children due to their training. A large  
148 proportion of those who delayed childbearing due to surgical training, regretted this  
149 decision (83% childbearing, 86% non-childbearing). Age of first pregnancy of childbearing  
150 surgeons and partners of non-childbearing surgeons was comparable (Table 1). Amongst the  
151 402 respondents who were parents or had actively tried to conceive, 23% had undergone  
152 fertility testing (Table 1).

153

154 **Table 1: Characteristics of the survey participants**

|                                                                     | Childbearing surgeon<br>n= 346 (%) | Non-childbearing<br>surgeon n=70 (%) | p value |
|---------------------------------------------------------------------|------------------------------------|--------------------------------------|---------|
| <b>Relationship status</b>                                          |                                    |                                      |         |
| Single, never married                                               | 31 (9)                             | 0 (0)                                | 0.01    |
| Married/civil partnership/significant other                         | 308 (89)                           | 70 (100)                             |         |
| Divorced/separated and single                                       | 7 (2)                              | 0 (0)                                |         |
| <b>Race or ethnicity</b>                                            |                                    |                                      |         |
| White/Caucasian                                                     | 273 (79)                           | 46 (66)                              | 0.02    |
| Asian/Asian British                                                 | 38 (11)                            | 17 (24)                              |         |
| Mixed/Multiple ethnic groups                                        | 18 (5)                             | 3 (4)                                |         |
| Black, African, Caribbean/Black British                             | 13 (4)                             | 1 (1)                                |         |
| Other                                                               | 4 (1)                              | 2 (3)                                |         |
| Not stated                                                          | 0 (0)                              | 1 (1)                                |         |
| <b>Age (years)</b>                                                  |                                    |                                      |         |
| 25-29                                                               | 37 (11)                            | 6 (9)                                | 0.67    |
| 30-34                                                               | 171 (49)                           | 38 (54)                              |         |
| 35-39                                                               | 122 (35)                           | 22 (31)                              |         |
| 40-44                                                               | 15 (4)                             | 3 (4)                                |         |
| >45                                                                 | 1 (1)                              | 1 (1)                                |         |
| <b>Surgical Speciality</b>                                          |                                    |                                      |         |
| Cardiothoracic Surgery                                              | 2 (1)                              | 0 (0)                                | <0.0001 |
| ENT Surgery                                                         | 31 (9)                             | 12 (17)                              |         |
| General Surgery                                                     | 42 (12)                            | 3 (4)                                |         |
| Neurosurgery                                                        | 6 (2)                              | 1 (1)                                |         |
| Obstetrics and Gynaecology                                          | 107 (31)                           | 1 (1)                                |         |
| Oral and Maxillofacial Surgery                                      | 9 (3)                              | 2 (3)                                |         |
| Paediatric Surgery                                                  | 8 (2)                              | 0 (0)                                |         |
| Plastic Surgery                                                     | 12 (3)                             | 3 (4)                                |         |
| Trauma and Orthopaedics                                             | 27 (8)                             | 3 (4)                                |         |
| Urology                                                             | 75 (22)                            | 42 (60)                              |         |
| Vascular Surgery                                                    | 16 (5)                             | 3 (4)                                |         |
| Other                                                               | 11 (3)                             | 0 (0)                                |         |
| <b>Partner occupation</b>                                           |                                    |                                      |         |
| Physician                                                           | 80 (26)                            | 39 (56)                              | <0.0001 |
| Surgeon                                                             | 40 (13)                            | 2 (3)                                |         |
| Other                                                               | 183 (59)                           | 28 (40)                              |         |
| Unemployed                                                          | 4 (1)                              | 1 (1)                                |         |
| Prefer not to answer                                                | 1 (0)                              | 0 (0)                                |         |
| <b>Partners working hours/week (excluding domestic obligations)</b> |                                    |                                      |         |
| 0-19 hours                                                          | 7 (2)                              | 8 (11)                               | 0.0001  |
| 20-39 hours                                                         | 79 (26)                            | 24 (34)                              |         |
| 40-59 hours                                                         | 184 (60)                           | 37 (52)                              |         |
| >60 hours                                                           | 38 (11)                            | 1 (1)                                |         |
| <b>Number of biological children</b>                                |                                    |                                      |         |
| 0                                                                   | 172 (50)                           | 26 (37)                              | 0.28    |
| 1                                                                   | 81 (23)                            | 21 (30)                              |         |
| 2                                                                   | 70 (20)                            | 18 (26)                              |         |
| >3                                                                  | 23 (7)                             | 5 (7)                                |         |
| <b>Number of children (mean)</b>                                    |                                    |                                      |         |
|                                                                     | 0.84                               | 1.04                                 | 0.13    |
| <b>Age of child bearer at first live birth (years, mean)</b>        |                                    |                                      |         |
|                                                                     | 31.9                               | 31.2                                 | 0.10    |
| <b>Undergone Infertility testing</b>                                |                                    |                                      |         |
|                                                                     | 53 (24)                            | 11 (22)                              | 0.86    |

155



## 156 **Pregnancy loss and infertility**

157 Of the 222 childbearing surgical trainees who had been pregnant, 36% had experienced a  
 158 pregnancy loss and the pregnancy loss rate was 31%; these figures were comparable to data  
 159 from non-surgeon partners (Table 2). In surgeons, in all age groups rates of pregnancy loss  
 160 were higher than those reported in a large registry based study<sup>19</sup>. Furthermore, loss rates  
 161 were 35% in those aged under 35 years at the time of survey completion, a rate which is  
 162 over 3 times that which would be expected in this age group (Table 2). Data was not  
 163 available regarding the ages of non-surgeon partners at time of pregnancy loss. The majority  
 164 of pregnancy losses occurred before 12 weeks of gestation; no still births were reported  
 165 (Table 2). After pregnancy loss, 1 in 3 childbearing surgical trainees did not take any time of  
 166 work and only 47% disclosed their loss to a colleague. In general, surgical trainees who did  
 167 share their loss with colleagues found them to be supportive (Supplemental Table 1).

168

169 **Table 2: Pregnancy loss in surgical training**

|                                                                 | Childbearing surgeon | Non-surgeon partner | p value          |
|-----------------------------------------------------------------|----------------------|---------------------|------------------|
| <b>Number of individuals who experienced pregnancy loss (%)</b> | 80 (36)              | 19 (40)             | 0.62             |
| <b>Gestation at pregnancy loss</b>                              |                      |                     |                  |
| Losses (n) at <12 weeks (%)                                     | 114 (90)             | 24 (83)             | 0.3              |
| Losses (n) 12-24 weeks (%)                                      | 13 (10)              | 5 (17)              |                  |
| Still births (%)                                                | 0 (0)                | 0 (0)               |                  |
| <b>Pregnancy loss rate (%)</b>                                  |                      |                     | <b>Expected*</b> |
| All ages (410 <sup>^</sup> )                                    | 31                   | 30 (19)             | -                |
| <30 years <sup>§</sup> (4 <sup>^</sup> )                        | 25                   | -                   | 10               |
| 30-34 years <sup>§</sup> (115 <sup>^</sup> )                    | 35                   | -                   | 11               |
| 35-39 years <sup>§</sup> (246 <sup>^</sup> )                    | 30                   | -                   | 17               |
| ≥40 years <sup>§</sup> (45 <sup>^</sup> )                       | 36                   | -                   | 32               |

170 \* Pregnancy loss rates as reported in ages 25-29, 30-34, 35-39, and 40-44 years in Magnus et al<sup>19</sup> § Participant  
 171 age at time of survey completion, ^total number pregnancies in childbearing surgeons in this age group, - data  
 172 not available.

173

## 174 **Pregnancy-associated complications**

175 Almost 1 in 5 childbearing surgical trainees had a pregnancy complication that necessitated  
 176 bedrest and nearly 1 in 10 needed more than 2 weeks off work, these figures are

177 comparable to those of partners of surgical trainees (Table 3). The majority of trainees who  
 178 required time away from work felt their colleagues and training programme were  
 179 supportive of this time off (60% and 62%, respectively). Twelve childbearing surgical  
 180 trainees reported a financial loss due to work restriction during pregnancy; financial losses  
 181 ranged from £3,000 to £50,000 (median £7,500).

182 Minor pregnancy-associated complications included hyperemesis, musculoskeletal issues,  
 183 gestational diabetes, and gastro-oesophageal reflux. Trainees experienced minor  
 184 complications in 175 pregnancies out of a total of 282 pregnancies (62%), a proportion not  
 185 significantly different to rates of minor pregnancy-associated complications in the partners  
 186 of non-childbearing surgical trainees (Table 3). Major pregnancy-associated complications  
 187 were defined as pre-eclampsia or hypertension, placental abruption or bleeding in  
 188 pregnancy, placenta praevia or accrete, intrauterine growth restriction (IUGR), and placental  
 189 insufficiency (including oligohydramnios). Childbearing surgical trainees were significantly  
 190 more likely to experience major pregnancy complications than the partners of non-  
 191 childbearing surgical trainees (Table 3). Rates of neonatal, intrapartum, and postpartum  
 192 complications were higher in childbearing surgical trainees than in the partners of surgical  
 193 trainees, however statistical significance was not reached in this small sample size (Table 3).  
 194 Babies of childbearing surgical trainees were comparable in weight to those of non-  
 195 childbearing surgical trainees (Table 3).

196

197 **Table 3: Pregnancy complications in surgical training**

|                                                    | Childbearing surgeon, n (%) | Non-surgeon partner, n (%) | p value |
|----------------------------------------------------|-----------------------------|----------------------------|---------|
| <b>Pregnancy complications</b>                     |                             |                            |         |
| Pregnancy with complication requiring bedrest      | 50 (18)                     | 10 (14)                    | 0.6     |
| Pregnancy with one or more minor complication      | 175 (62)                    | 35 (51)                    | 0.1     |
| Pregnancy with one or more major complication      | 87 (31)                     | 6 (9)                      | 0.0001  |
| Delivery with one or more intrapartum complication | 60 (21)                     | 9 (13)                     | 0.13    |
| Delivery with one or more postpartum complication  | 27 (10)                     | 4 (6)                      | 0.48    |
| <b>Neonatal complications</b>                      |                             |                            |         |
| NICU stay                                          | 17 (6)                      | 3 (4)                      | 0.74    |
| Delivery <38 weeks                                 | 35 (12)                     | 7 (10)                     |         |
| <b>Birth weight</b>                                |                             |                            |         |
| <2.5kg                                             | 10 (4)                      | 6 (8)                      | 0.21    |
| 2.5-3kg                                            | 54 (19)                     | 15 (22)                    |         |
| 3-4kg                                              | 188 (66)                    | 41 (59)                    |         |

|           |         |       |  |
|-----------|---------|-------|--|
| >4kg      | 30 (11) | 5 (7) |  |
| No answer | 1 (0)   | 2 (3) |  |

198 **Work schedule during pregnancy**

199 Over 70% of childbearing surgical trainees worked for 40 hours or more each week during  
 200 pregnancy and 4% worked more than 60 hours per week. Most trainees continued to work  
 201 at night throughout their pregnancy and half continued to operate for more than 9 hours  
 202 each week up until maternity leave (Table 4). The majority (70%) of childbearing surgical  
 203 trainees altered their work schedule during pregnancy; 77% felt guilty for burdening their  
 204 colleagues by reducing their workload. Of those trainees who did not alter their work  
 205 schedule in pregnancy, 40% made this decision to avoid being ‘considered weak’ and 35%  
 206 because of concerns surrounding burdening colleagues.

207 **Table 4: Working patterns during pregnancy**

|                                                        | Childbearing surgeon, n (%) | Non-surgeon partner, n (%) | p value |
|--------------------------------------------------------|-----------------------------|----------------------------|---------|
| <b>Average hours worked per week</b>                   |                             |                            |         |
| <40                                                    | 78 (28)                     | 33 (48)                    | 0.003   |
| 40-60                                                  | 190 (67)                    | 36 (52)                    |         |
| >60                                                    | 10 (4)                      | 0                          |         |
| No answer                                              | 5 (2)                       | 0                          |         |
| <b>Frequency of overnight on call/nightshifts</b>      |                             |                            |         |
| None                                                   | 53 (19)                     |                            |         |
| 2-4/month                                              | 147 (52)                    |                            |         |
| 4-6/month                                              | 66 (23)                     |                            |         |
| >6/month                                               | 15 (5)                      |                            |         |
| No answer                                              | 2 (1)                       |                            |         |
| <b>Hours operating last trimester</b>                  |                             |                            |         |
| 0-8                                                    | 140 (49)                    |                            |         |
| 9-12                                                   | 75 (27)                     |                            |         |
| 13-16                                                  | 41 (14)                     |                            |         |
| >16                                                    | 26 (9)                      |                            |         |
| No answer                                              | 1 (0.4)                     |                            |         |
| <b>Average hours worked per week in last trimester</b> |                             |                            |         |
| <30                                                    | 78 (28)                     |                            |         |
| 30-40                                                  | 96 (34)                     |                            |         |
| 41-60                                                  | 105 (37)                    |                            |         |
| >60                                                    | 2 (1)                       |                            |         |
| No answer                                              | 2 (1)                       |                            |         |

208

209 **Breastfeeding**

210 The majority (98%) of childbearing surgical trainees wanted to breastfeed their child, and  
 211 85% achieved this for over 6 months. Over two thirds of surgical trainees (79%) breastfed  
 212 for as long as they wanted to. Surgical trainees who stopped breastfeeding early cited

213 inadequate work provisions to enable continued breastfeeding as the most common reason;  
214 other barriers included insufficient milk supply, struggles with work schedules and fatigue or  
215 illness.

216

### 217 **Parental leave**

218 Childbearing surgical trainees took a mean of 10.2 months of parental leave, which was  
219 comparable to parental leave taken by partners of non-childbearing surgical trainees (10.1  
220 months). The majority of non-childbearing surgical trainees took 2 weeks of parental leave  
221 (n=30, 73%); only 3 respondents took more than 8 weeks of leave, and 2 did not take any  
222 leave. Two thirds of non-childbearing surgical trainees felt that the amount of leave taken  
223 was insufficient (n=27, 66%) but cited concerns that taking more time would be viewed  
224 negatively by colleagues (33%) and that they were reluctant to prolong their training (26%).  
225 The non-childbearing surgical trainees who took more than 8 weeks parental leave did not  
226 find this easy to arrange. Only a third of non-childbearing surgical trainees found they were  
227 able to organise their parental leave without any difficulties (Supplemental Table 2).

228

### 229 **Return to work**

230 On return to work after parental leave, 61% (n=104) of childbearing surgical trainees  
231 reduced their working hours to less than 40 hours per week, compared to only 15% (n=6) of  
232 non-childbearing surgical trainees. Approximately 10% of both childbearing and non-  
233 childbearing surgical trainees altered their work schedules after parental leave to  
234 accommodate family life but continued to work more than 40 hours per week. Almost 1 in 4  
235 non-childbearing trainees were unhappy with their work schedule on return to work but did  
236 not change it, the main factor preventing non-childbearing trainees from adjusting their  
237 work schedule was worry that it would be viewed negatively by colleagues (n=5, 56%,  
238 Supplemental Table 3).

239

### 240 **Discussion**

241 This study of pregnancy and parenthood in 416 UK surgical trainees reveals that surgeons in  
242 training under 35 years of age experience a pregnancy loss rate of 35%, a rate that is more  
243 than three times that which would be expected in women of a similar age. In childbearing  
244 surgeons of all ages, rates of pregnancy loss are ~30%, which is comparable to loss rates  
245 reported previously in pregnant female surgeons<sup>17,19</sup>. Our data revealed similar pregnancy  
246 loss rates in the childbearing partners of surgical trainees; this may reflect the fact that  
247 nearly 60% of childbearing partners of surgical trainees in this survey were doctors,  
248 investigation of pregnancy loss rates in other health care professionals should be  
249 undertaken. Previous studies have reported that night shifts and working more than 40  
250 hours a week are associated with higher risks of miscarriage<sup>20-22</sup>. Whilst working patterns  
251 prior to miscarriage were not assessed in our study, we report that 57% of childbearing  
252 surgical trainees worked >40 hours per week during pregnancies that resulted in a live birth  
253 and that 81% continuing to work night shifts or take part in an overnight on call during  
254 pregnancy. Limiting working hours and overnight commitments for pregnant surgical  
255 trainees may help reduce miscarriage rates.

256 The psychological impact of early pregnancy loss is well recognised<sup>23-25</sup>. However, 33% of  
257 childbearing surgical trainees in this study did not take any time off work after miscarriage  
258 and approximately half did not reveal to colleagues that they had experienced a pregnancy  
259 loss. A survey undertaken in the UK found that 27% of surgical trainees did not feel  
260 supported by their department during pregnancy, this may explain hesitancy to disclose  
261 information relating to pregnancy loss<sup>26</sup>. It is well established that doctors are less likely to  
262 take days off sick in comparison to other healthcare workers with many citing that taking  
263 time off will negatively affect their careers and burden their colleagues with extra  
264 workload<sup>27,28</sup>. Surgical training programs should consider offering bereavement support and  
265 mandated leave after pregnancy loss to reduce this burden of guilt. Appointment of a lead  
266 clinician for pregnancy support may help trainees navigate this difficult area, providing a  
267 single point of contact to facilitate changes to working schedules in early pregnancy and  
268 provide guidance after loss.

269

270 Studies have previously reported that female physicians and surgeons commonly delay  
271 pregnancy due to training commitments despite well-recognised increases infertility and  
272 obstetric risks after 35 years of age<sup>15</sup>. Our survey reveals that approximately half of all  
273 surgical trainees in the UK delay childbearing and that the mean age at birth of first child  
274 amongst childbearing trainees is 31.9 years. In the UK population, the mean age at birth of  
275 first child is 27.8 years<sup>29</sup>. The vast majority (>80%) of trainee surgeons regretted their  
276 decision to delay childbearing, and we found that both male and female surgeons  
277 underwent infertility investigations more frequently than would be expected in the general  
278 UK population<sup>30</sup>. This data is in keeping with data from the USA which reported higher rates  
279 of infertility problems and use of assisted reproduction technologies amongst female  
280 orthopaedic surgeons and postgraduate medical trainees, but is in contrast to a study in  
281 Irish surgical trainees<sup>13,15,31</sup>. Cultural change and open conversations may enable surgical  
282 trainees to make better informed decisions about timing of attempts to become parents so  
283 that fewer individuals regret decisions to postpone pregnancy.

284

285 Our study indicates that major complications occur in ~30% of pregnancies in childbearing  
286 surgical trainees, a rate that was significantly higher than a socio-demographically matched  
287 control group and in keeping with other studies of pregnancy in childbearing  
288 surgeons<sup>12,13,15,17</sup>. The causes of these high pregnancy complication rates cannot be  
289 elucidated by this survey-study, however, associations of adverse pregnancy outcomes with  
290 working more than 40 hours a week, prolonged standing, high fatigue scores, shift and night  
291 work have been reported; these factors are common in surgical training<sup>20,22,32,33</sup>.  
292 Furthermore, evidence exists that surgical trainees of both sexes omit healthcare  
293 maintenance activities including medical check-ups and exercise<sup>34</sup>. Our study suggests that  
294 even in combination with statutory maternity leave policies, the rest and working time  
295 requirements of the EWTD affords insufficient protection to pregnant surgical trainees. In  
296 view of the significantly increased risk of major pregnancy complication in this group it has  
297 previously been recommended that childbearing surgeons should be treated as a high-risk  
298 obstetric group, a recommendation that is supported by our data<sup>13,35</sup>. Furthermore, our  
299 study suggests that employers should, as a matter of priority, offer altered working  
300 schedules to pregnant surgical trainees to protect obstetric health.

301 Our study reveals that financial losses due to work restrictions in pregnancy are not  
302 uncommon for surgical trainees, steps should be taken to address this source of gender pay  
303 gap.

304 The WHO recommends that infants are exclusively breastfed for the first six months of life,  
305 and that mothers should be encouraged to breastfeed for at least a year to provide  
306 protection from illnesses and long-term diseases. The rate of initiated and continued  
307 breastfeeding in our study was higher than that reported amongst US resident physicians  
308 and orthopaedic surgeons and the UK national average<sup>13,36,37</sup>. Over 75% of surgical trainees  
309 breastfed for as long as they wanted, however, among those who stopped early, 35%  
310 reported inadequate work provisions as a factor in early cessation.

311 All UK employees have the right to 52 weeks of maternity leave, and most childbearing  
312 individuals will qualify for 39 weeks of statutory maternity pay. In our study, childbearing  
313 surgical trainees took an average of 10.2 months of parental leave, the majority of non-  
314 childbearing surgical trainees took 1-2 weeks of parental leave. Most non-childbearing  
315 surgical trainees felt that their parental leave was insufficient but were concerned that  
316 taking more might be viewed negatively by colleagues. Furthermore, only 15% of non-  
317 childbearing trainees reduced their working hours after parental leave compared to 61% of  
318 childbearing trainees. It may be that adopting a Scandinavian model of shared paid parental  
319 leave, with periods ringfenced for each parent, would lead to a more equitable approach to  
320 childcare in the medical workforce.

321 We predict that selection bias was present in this study and that non-childbearing trainees  
322 and those who experienced uncomplicated pregnancies were less likely to respond. Indeed,  
323 most survey responses were from female trainees despite male trainees comprising most of  
324 the surgical workforce. We also recognise that our findings are limited to experiences of  
325 surgical trainees in the UK, and therefore caution should be exercised before initiating  
326 changes to working practices outside of this setting.

327

328 In summary, this study provides a contemporary picture of the risks and challenges facing  
329 surgical trainees in the UK who are, or wish to become, parents. Our data highlights the  
330 need for urgent action to reduce rates of miscarriage and major pregnancy complications in  
331 EWTD compliant settings. It is likely that altering working schedules and limiting physical

332 exertion will mitigate these risks, however, consideration will need to be taken of the  
333 impact of changes in working patterns on surgical training. Furthermore, this study indicates  
334 that cultural change is needed to empower pregnant trainees to ask for working  
335 modifications and time off in pregnancy and to facilitate the ability of non-childbearing  
336 surgical parents to take longer periods of parental leave and to access alterations in work  
337 schedules. Training programs and national surgical associations must evolve to progress  
338 diversity in the surgical workforce and protect the obstetric health of surgeons.

339

#### 340 **Acknowledgements**

341 We acknowledge the contribution of the surgeons in training who provided data for this  
342 study.

#### 343 **Data sharing statement**

344 Data utilised in the preparation of this manuscript will be made available to researchers  
345 upon reasonable request to the corresponding author.

#### 346 **Ethical approval**

347 This research was conducted under ethical approval granted via the Central University  
348 Research Ethics Committee, University of Oxford (Ref: R80778/RE001).

349

#### 350 **Transparency statement**

351 The manuscript's guarantors (J.W. and S.A.H.) affirm that the manuscript is an honest,  
352 accurate, and transparent account of the study being reported; that no important aspects of  
353 the study have been omitted; and that any discrepancies from the study as planned (and, if  
354 relevant, registered) have been explained.

#### 355 **Funding**



356 S.A.H. is a Wellcome Trust Clinical Career Development Fellow.

357 **Role of the Funder/Sponsor:** The sponsors had no role in the design and conduct of the  
358 study; collection, management, analysis, and interpretation of the data; preparation,  
359 review, or approval of the manuscript; and decision to submit the manuscript for  
360 publication.

361 **Competing interests**

362 None

363 **Contributors**

364 J.W., S.M., and S.A.H designed this study. J.W. and S.A.H. analysed and interpreted data.  
365 J.W. and S.A.H. wrote the first draft of the manuscript. All authors participated in the  
366 preparation of the manuscript by reading and commenting on the draft prior to submission.  
367 The corresponding author attests that all listed authors meet authorship criteria and that no  
368 others meeting the criteria have been omitted.

369

370 **Copyright statement**

371 The Corresponding Author has the right to grant on behalf of all authors and does grant on  
372 behalf of all authors, a worldwide licence to the Publishers and its licensees in perpetuity, in  
373 all forms, formats and media (whether known now or created in the future), to i) publish,  
374 reproduce, distribute, display and store the Contribution, ii) translate the Contribution into  
375 other languages, create adaptations, reprints, include within collections and create  
376 summaries, extracts and/or, abstracts of the Contribution, iii) create any other derivative  
377 work(s) based on the Contribution, iv) to exploit all subsidiary rights in the Contribution, v)

378 the inclusion of electronic links from the Contribution to third party material where-ever it  
379 may be located; and, vi) licence any third party to do any or all of the above.

## 380 **References**

- 381 1. Jefferson L, Bloor K, Maynard A. Women in medicine: historical perspectives and  
382 recent trends. *Br Med Bull* [Internet]. 2015 Jun;114(1):5–15. Available from:  
383 <https://academic.oup.com/bmb/article-lookup/doi/10.1093/bmb/ldv007>
- 384 2. Elstone M. Women and Medicine: The Future. *R Coll Physicians*. 2009;(June  
385 2009):17.
- 386 3. Newman TH, Parry MG, Zakeri R, Pegna V, Nagle A, Bhatti F, et al. Gender diversity in  
387 UK surgical specialties: a national observational study. *BMJ Open* [Internet]. 2022 Feb  
388 21;12(2):e055516. Available from:  
389 <https://bmjopen.bmj.com/lookup/doi/10.1136/bmjopen-2021-055516>
- 390 4. Arya S, Franco-Mesa C, Erben Y. An analysis of gender disparities amongst United  
391 States medical students, general surgery residents, vascular surgery trainees, and the  
392 vascular surgery workforce. *J Vasc Surg* [Internet]. 2022;75(1):5–9. Available from:  
393 <http://dx.doi.org/10.1016/j.jvs.2021.09.029>
- 394 5. Digital N. Medical and dental staff by gender, specialty and grade AH2667. 28  
395 February 2019 to 28 February 2019. [Internet]. Available from:  
396 [https://digital.nhs.uk/data-and-information/find-data-and-](https://digital.nhs.uk/data-and-information/find-data-and-publications/supplementary-information/2019-supplementary-information-files/medical-and-dental-staff-by-gender-specialty-and-grade-ah2667)  
397 [publications/supplementary-information/2019-supplementary-information-](https://digital.nhs.uk/data-and-information/find-data-and-publications/supplementary-information/2019-supplementary-information-files/medical-and-dental-staff-by-gender-specialty-and-grade-ah2667)  
398 [files/medical-and-dental-staff-by-gender-specialty-and-grade-ah2667](https://digital.nhs.uk/data-and-information/find-data-and-publications/supplementary-information/2019-supplementary-information-files/medical-and-dental-staff-by-gender-specialty-and-grade-ah2667)
- 399 6. Gomez LE, Bernet P. Diversity improves performance and outcomes. *J Natl Med Assoc*  
400 [Internet]. 2019;111(4):383–92. Available from:  
401 <https://doi.org/10.1016/j.jnma.2019.01.006>
- 402 7. Wallis CJ, Ravi B, Coburn N, Nam RK, Detsky AS, Satkunasivam R. Comparison of  
403 postoperative outcomes among patients treated by male and female surgeons: a  
404 population based matched cohort study. *BMJ* [Internet]. 2017 Oct 10;359:j4366.  
405 Available from: <http://www.ncbi.nlm.nih.gov/pubmed/29018008>
- 406 8. Fysh THS, Thomas G, Ellis H. Who wants to be a surgeon? A study of 300 first year  
407 medical students. *BMC Med Educ*. 2007;7:1–5.
- 408 9. Fitzgerald JEF, Tang SW, Ravindra P, Maxwell-Armstrong CA. Gender-related  
409 perceptions of careers in surgery among new medical graduates: Results of a cross-  
410 sectional study. *Am J Surg* [Internet]. 2013;206(1):112–9. Available from:  
411 <http://dx.doi.org/10.1016/j.amjsurg.2012.04.009>
- 412 10. Kerr HL, Armstrong LA, Cade JE. Barriers to becoming a female surgeon and the  
413 influence of female surgical role models. *Postgrad Med J*. 2016;92(1092):576–80.
- 414 11. Bellini MI, Graham Y, Hayes C, Zakeri R, Parks R, Papalois V. A woman's place is in  
415 theatre: Women's perceptions and experiences of working in surgery from the

- 416 Association of Surgeons of Great Britain and Ireland women in surgery working group.  
417 BMJ Open. 2019;9(1):1–8.
- 418 12. Lerner LB, Stolzmann KL, Gulla VD. Birth Trends and Pregnancy Complications among  
419 Women Urologists. J Am Coll Surg [Internet]. 2009;208(2):293–7. Available from:  
420 <http://dx.doi.org/10.1016/j.jamcollsurg.2008.10.012>
- 421 13. Hamilton AR, Tyson MD, Braga JA, Lerner LB. Childbearing and Pregnancy  
422 Characteristics of Female Orthopaedic Surgeons. J Bone Jt Surg [Internet]. 2012 Jun  
423 6;94(11):e77. Available from: <https://journals.lww.com/00004623-201206060-00016>
- 424 14. L Eskenazi JW. The pregnant plastic surgical resident: results of a survey of women  
425 plastic surgeons and plastic surgery residency directors. Plast Reconstr Surg.  
426 1995;95(2):330–5.
- 427 15. Rogers AC, Wren SM, McNamara DA. Gender and Specialty Influences on Personal  
428 and Professional Life Among Trainees. Ann Surg. 2019;269(2):383–7.
- 429 16. Eysenbach G. Improving the quality of Web surveys: the Checklist for Reporting  
430 Results of Internet E-Surveys (CHERRIES). J Med Internet Res [Internet]. 2004 Sep  
431 29;6(3):e34. Available from: <http://www.ncbi.nlm.nih.gov/pubmed/15471760>
- 432 17. Rangel EL, Castillo-Angeles M, Easter SR, Atkinson RB, Gosain A, Hu YY, et al.  
433 Incidence of Infertility and Pregnancy Complications in US Female Surgeons. JAMA  
434 Surg. 2021;156(10):905–15.
- 435 18. Rangel EL, Smink DS, Castillo-Angeles M, Kwakye G, Changala M, Haider AH, et al.  
436 Pregnancy and motherhood during surgical training. JAMA Surg. 2018;153(7):644–52.
- 437 19. Magnus MC, Wilcox AJ, Morken NH, Weinberg CR, Håberg SE. Role of maternal age  
438 and pregnancy history in risk of miscarriage: Prospective register based study. BMJ.  
439 2019;364:1–8.
- 440 20. Cai C, Vandermeer B, Khurana R, Nerenberg K, Featherstone R, Sebastianski M, et al.  
441 The impact of occupational shift work and working hours during pregnancy on health  
442 outcomes: a systematic review and meta-analysis. Am J Obstet Gynecol.  
443 2019;221(6):563–76.
- 444 21. Jin LZ, Hjollund NH, Andersen AMN, Olsen J. Shift work, job stress, and late fetal loss:  
445 The National Birth Cohort in Denmark. J Occup Environ Med. 2004;46(11):1144–9.
- 446 22. Begtrup LM, Specht IO, Hammer PEC, Flachs EM, Garde AH, Hansen J, et al. Night  
447 work and miscarriage: a Danish nationwide register-based cohort study. Occup  
448 Environ Med [Internet]. 2019 May;76(5):302–8. Available from:  
449 <https://oem.bmj.com/lookup/doi/10.1136/oemed-2018-105592>
- 450 23. Farren J, Jalmbrant M, Ameye L, Joash K, Mitchell-Jones N, Tapp S, et al. Post-  
451 traumatic stress anxiety and depression following miscarriage or ectopic pregnancy: A  
452 prospective cohort study. BMJ Open. 2016;6(11).
- 453 24. Farren J, Mitchell-Jones N, Verbakel JY, Timmerman D, Jalmbrant M, Bourne T. The  
454 psychological impact of early pregnancy loss. Hum Reprod Update. 2018;24(6):731–  
455 49.

- 456 25. Kulathilaka S, Hanwella R, de Silva VA. Depressive disorder and grief following  
457 spontaneous abortion. *BMC Psychiatry* [Internet]. 2016;16(1):1–6. Available from:  
458 <http://dx.doi.org/10.1186/s12888-016-0812-y>
- 459 26. Mohan H, Ali O, Gokani V, McGoldrick C, Smitham P, Fitzgerald JEF, et al. Surgical  
460 trainees' experience of pregnancy, maternity and paternity leave: A cross-sectional  
461 study. *Postgrad Med J*. 2019;95(1128):552–7.
- 462 27. Oxtoby K. Why doctors don't take sick leave. *BMJ* [Internet]. 2015 Dec 9;h6272.  
463 Available from: <https://www.bmj.com/lookup/doi/10.1136/bmj.h6272>
- 464 28. Glauser W. Is the culture of medicine contributing to miscarriages among female  
465 physicians? *CMAJ*. 2019;191(44):E1229–30.
- 466 29. Office of National Statistics (ONS). Information on births by parents' characteristic  
467 statistics.
- 468 30. Wilkes S, Chinn DJ, Murdoch A, Rubin G. Epidemiology and management of infertility:  
469 A population-based study in UK primary care. *Fam Pract*. 2009;26(4):269–74.
- 470 31. Davids JS, Scully RE, Melnitchouk N. Impact of Procedural Training on Pregnancy  
471 Outcomes and Career Satisfaction in Female Postgraduate Medical Trainees in the  
472 United States. *J Am Coll Surg* [Internet]. 2017 Sep;225(3):411-418e2. Available from:  
473 <https://journals.lww.com/00019464-201709000-00008>
- 474 32. Snijder CA, Brand T, Jaddoe V, Hofman A, Mackenbach JP, Steegers EAP, et al.  
475 Physically demanding work, fetal growth and the risk of adverse birth outcomes. The  
476 Generation R Study. *Occup Environ Med* [Internet]. 2012 Aug;69(8):543–50. Available  
477 from: <https://oem.bmj.com/lookup/doi/10.1136/oemed-2011-100615>
- 478 33. Behbehani S, Tulandi T. Obstetrical Complications in Pregnant Medical and Surgical  
479 Residents. *J Obstet Gynaecol Canada*. 2015;37(1):25–31.
- 480 34. Yoo PS, Tackett JJ, Maxfield MW, Fisher R, Huot SJ, Longo WE. Personal and  
481 Professional Well-Being of Surgical Residents in New England. *J Am Coll Surg*  
482 [Internet]. 2017 Jun;224(6):1015–9. Available from:  
483 <https://journals.lww.com/00019464-201706000-00003>
- 484 35. Miller NH, Katz VL, Cefalo RC. Pregnancies among physicians. A historical cohort  
485 study. *J Reprod Med* [Internet]. 1989 Oct;34(10):790–6. Available from:  
486 <http://www.ncbi.nlm.nih.gov/pubmed/2795562>
- 487 36. Miller NH, Miller DJ, Chism M. Breastfeeding practices among resident physicians.  
488 *Pediatrics* [Internet]. 1996 Sep;98(3 Pt 1):434–7. Available from:  
489 <http://www.ncbi.nlm.nih.gov/pubmed/8784369>
- 490 37. Mc Andrew F, Thompson J, Fellows L, Large A, Spped M, Renfrew MJ. Infant Feeding  
491 Survey - UK, 2010 [Internet]. 2012. Available from: [https://digital.nhs.uk/data-and-](https://digital.nhs.uk/data-and-information/publications/statistical/infant-feeding-survey/infant-feeding-survey-uk-2010)  
492 [information/publications/statistical/infant-feeding-survey/infant-feeding-survey-uk-](https://digital.nhs.uk/data-and-information/publications/statistical/infant-feeding-survey/infant-feeding-survey-uk-2010)  
493 [2010](https://digital.nhs.uk/data-and-information/publications/statistical/infant-feeding-survey/infant-feeding-survey-uk-2010)

494
